# Supplementary material
Source: PubMed Central journal article supplement (PMC4484374)
Supplement: DS_10.1177_0022034513490168.pdf [file DS_10.1177_0022034513490168.pdf]

## RESEARCH REPORTS

Clinical

W. Marcenes<sup>1\*</sup>, N.J. Kassebaum<sup>2</sup>, E. Bernabé<sup>3</sup>,  
A. Flaxman<sup>2</sup>, M. Naghavi<sup>2</sup>, A. Lopez<sup>2,4</sup>,  
and C.J.L. Murray<sup>2</sup>

<sup>1</sup>Institute of Dentistry, Barts and The London School of Medicine and Dentistry, Queen Mary University of London, London, UK; <sup>2</sup>Institute for Health Metrics and Evaluation, University of Washington, Seattle, USA; <sup>3</sup>King's College London Dental Institute, Unit of Dental Public Health, London, UK; and <sup>4</sup>School of Population Health, University of Queensland, Brisbane, Australia; \*corresponding author, w.marcenes@qmul.ac.uk

*J Dent Res* DOI: 10.1177/0022034513490168

### APPENDIX

# Global Burden of Oral Conditions in 1990-2010: A Systematic Analysis

**Appendix Table 1.** DALYs (in thousands) with 95% Uncertainty Intervals for Oral Conditions by Age Groups and Genders in 2010

| Age Group       | Men              |                          |                      |                          |                   |                          |                     |                           |
|-----------------|------------------|--------------------------|----------------------|--------------------------|-------------------|--------------------------|---------------------|---------------------------|
|                 | Untreated Caries |                          | Severe Periodontitis |                          | Severe Tooth Loss |                          | All Oral Conditions |                           |
| 1-4 yrs         | 52.2             | (20.8-102.2)             |                      |                          |                   |                          | 52.2                | (20.8-102.2)              |
| 5-9 yrs         | 219.0            | (87.6-420.9)             |                      |                          |                   |                          | 219.0               | (87.6-420.9)              |
| 10-14 yrs       | 257.2            | (102.4-499.8)            |                      |                          |                   |                          | 257.2               | (102.4-499.8)             |
| 15-19 yrs       | 246.9            | (101.1-483.3)            | <0.1                 | (0.0-0.1)                |                   |                          | 246.9               | (101.1-483.3)             |
| 20-24 yrs       | 281.4            | (112.8-558.8)            | 9.2                  | (3.4-19.1)               | 1.8               | (0.9-3.1)                | 292.4               | (118.7-583.0)             |
| 25-29 yrs       | 283.5            | (117.8-543.1)            | 85.7                 | (32.0-179.8)             | 16.8              | (9.4-27.2)               | 386.0               | (167.1-728.9)             |
| 30-34 yrs       | 246.8            | (101.5-476.2)            | 212.3                | (79.2-444.2)             | 39.0              | (22.3-62.5)              | 498.2               | (222.3-959.4)             |
| 35-39 yrs       | 218.4            | (89.0-430.0)             | 355.1                | (133.3-746.0)            | 66.2              | (38.0-106.4)             | 639.7               | (288.8-1,235.4)           |
| 40-44 yrs       | 166.8            | (68.8-322.7)             | 423.6                | (159.0-876.5)            | 99.5              | (55.6-159.9)             | 689.8               | (318.7-1,333.8)           |
| 45-49 yrs       | 134.0            | (55.8-262.1)             | 406.9                | (153.0-846.6)            | 133.8             | (76.1-216.8)             | 674.8               | (326.5-1,268.9)           |
| 50-54 yrs       | 116.2            | (47.7-221.4)             | 361.0                | (134.7-747.3)            | 179.1             | (103.7-286.3)            | 656.3               | (332.6-1,192.9)           |
| 55-59 yrs       | 100.2            | (42.0-191.8)             | 310.0                | (116.1-640.0)            | 231.6             | (132.0-367.4)            | 641.8               | (342.4-1,136.2)           |
| 60-64 yrs       | 68.7             | (28.9-130.9)             | 220.5                | (83.4-456.9)             | 264.9             | (152.4-414.4)            | 554.1               | (311.0-939.2)             |
| 65-69 yrs       | 45.7             | (19.5-85.6)              | 150.3                | (56.1-313.1)             | 281.4             | (161.5-442.0)            | 477.4               | (278.1-772.3)             |
| 70-74 yrs       | 32.6             | (13.9-61.6)              | 111.7                | (42.1-231.6)             | 275.4             | (158.2-432.1)            | 419.7               | (247.6-659.7)             |
| 75-79 yrs       | 19.6             | (8.2-37.5)               | 70.5                 | (26.6-144.5)             | 201.5             | (116.6-315.3)            | 291.5               | (173.2-451.6)             |
| 80+ yrs         | 13.0             | (5.5-24.7)               | 58.8                 | (21.7-121.1)             | 196.2             | (114.1-307.3)            | 268.0               | (157.4-416.9)             |
| <b>All ages</b> | <b>2,502.2</b>   | <b>(1,032.2-4,857.2)</b> | <b>2,775.5</b>       | <b>(1,047.2-5,737.9)</b> | <b>1,987.2</b>    | <b>(1,140.2-3,142.2)</b> | <b>7,264.9</b>      | <b>(3,768.2-12,923.9)</b> |
| Age Group       | Women            |                          |                      |                          |                   |                          |                     |                           |
|                 | Untreated Caries |                          | Severe Periodontitis |                          | Severe Tooth Loss |                          | All Oral Conditions |                           |
| 1-4 yrs         | 41.2             | (15.7-81.2)              |                      |                          |                   |                          | 41.2                | (15.7-81.2)               |
| 5-9 yrs         | 183.3            | (74.6-359.8)             |                      |                          |                   |                          | 183.3               | (74.6-359.8)              |
| 10-14 yrs       | 240.3            | (96.7-472.0)             |                      |                          |                   |                          | 240.3               | (96.7-472.0)              |
| 15-19 yrs       | 242.2            | (98.1-478.8)             | <0.1                 | (0.0-0.1)                |                   |                          | 242.2               | (98.1-478.9)              |
| 20-24 yrs       | 278.7            | (113.5-556.0)            | 8.4                  | (3.1-17.6)               | 2.0               | (1.1-3.5)                | 289.2               | (119.4-573.9)             |
| 25-29 yrs       | 282.9            | (115.5-546.1)            | 78.4                 | (29.3-162.6)             | 19.3              | (10.9-31.4)              | 380.6               | (169.5-715.5)             |
| 30-34 yrs       | 247.2            | (102.9-483.2)            | 192.9                | (71.8-397.5)             | 44.1              | (24.8-71.5)              | 484.2               | (217.2-916.6)             |
| 35-39 yrs       | 219.8            | (91.6-428.4)             | 321.1                | (119.7-668.3)            | 74.0              | (42.0-118.2)             | 614.9               | (278.6-1,175.3)           |
| 40-44 yrs       | 167.8            | (69.9-323.0)             | 380.8                | (143.5-794.5)            | 111.0             | (63.0-180.8)             | 659.6               | (313.2-1,254.6)           |
| 45-49 yrs       | 137.4            | (57.1-268.1)             | 369.6                | (138.1-773.5)            | 151.3             | (85.5-242.6)             | 658.3               | (324.9-1,227.0)           |
| 50-54 yrs       | 120.2            | (50.9-226.2)             | 330.3                | (123.7-694.4)            | 204.0             | (116.4-321.8)            | 654.5               | (341.0-1,177.2)           |
| 55-59 yrs       | 105.8            | (45.1-201.7)             | 288.8                | (108.1-616.7)            | 269.8             | (152.0-423.6)            | 664.4               | (361.7-1,159.1)           |
| 60-64 yrs       | 76.3             | (32.3-143.6)             | 214.8                | (80.2-455.4)             | 325.3             | (187.1-512.1)            | 616.5               | (344.8-1,021.4)           |
| 65-69 yrs       | 53.0             | (22.5-100.5)             | 153.1                | (57.7-325.2)             | 365.7             | (212.8-581.1)            | 571.8               | (331.9-918.1)             |
| 70-74 yrs       | 41.0             | (17.7-79.3)              | 123.2                | (46.2-264.1)             | 393.8             | (229.4-617.6)            | 558.0               | (330.3-886.6)             |
| 75-79 yrs       | 26.7             | (11.3-51.2)              | 84.8                 | (31.9-180.4)             | 318.5             | (183.3-500.2)            | 430.1               | (255.1-679.5)             |
| 80+ yrs         | 22.3             | (9.2-42.5)               | 91.3                 | (33.3-190.3)             | 402.3             | (232.5-627.5)            | 515.9               | (304.8-815.0)             |
| <b>All ages</b> | <b>2,486.2</b>   | <b>(1,033.9-4,829.0)</b> | <b>2,637.5</b>       | <b>(988.8-5,520.6)</b>   | <b>2,681.3</b>    | <b>(1,534.7-4,216.5)</b> | <b>7,805.0</b>      | <b>(4,200.0-13,486.0)</b> |

Note: Differences between genders were not of statistical significance, either for each specific age group or for all age groups combined.

**Appendix Table 2.** Changes in Disability-adjusted Life-years (DALYs, in thousands) and DALYs *per capita* (per 100,000 population) between 1990 and 2010 by GBD Regions\*, Shown as Changes due to Population Growth, Aging, and Changes in Gender- and Age-specific Disease Rates (untreated caries in deciduous teeth only)

| Region                                           | 1990 DALYs <sup>a</sup> | Isolated Pop. Growth <sup>b</sup> | Isolated Pop. Aging <sup>c</sup> | 2010 DALYs | % Δ Due to Pop. Growth | % Δ Due to Pop. Aging | % Δ Due to Δ Rates | % Δ 1990-2010 |
|--------------------------------------------------|-------------------------|-----------------------------------|----------------------------------|------------|------------------------|-----------------------|--------------------|---------------|
| <b>DALYs (in thousands)</b>                      |                         |                                   |                                  |            |                        |                       |                    |               |
| Global                                           | 405                     | 434                               | 429                              | 426        | 7.2                    | -1.1                  | -0.8               | 5.3           |
| Asia-Pacific, High income                        | 5                       | 4                                 | 4                                | 3          | -26.6                  | -0.5                  | -7.7               | -34.8         |
| Europe, Western                                  | 6                       | 6                                 | 6                                | 6          | -5.5                   | 0.1                   | -0.1               | -5.6          |
| Australasia                                      | <1                      | <1                                | <1                               | <1         | 10.6                   | -1.6                  | -17.3              | -8.3          |
| North America, High income                       | 7                       | 8                                 | 8                                | 8          | 11.2                   | -0.1                  | 0.2                | 11.4          |
| Europe, Central                                  | 7                       | 4                                 | 4                                | 4          | -37.1                  | -0.5                  | -1.2               | -38.8         |
| Latin America, Southern                          | 2                       | 1                                 | 1                                | 1          | -2.2                   | -0.8                  | 0.6                | -2.4          |
| Europe, Eastern                                  | 11                      | 7                                 | 7                                | 7          | -39.0                  | -1.1                  | -1.4               | -41.5         |
| Asia, East                                       | 97                      | 81                                | 79                               | 72         | -16.3                  | -2.4                  | -7.2               | -25.9         |
| Latin America, Tropical                          | 14                      | 13                                | 13                               | 13         | -3.7                   | -1.0                  | -2.7               | -7.5          |
| Latin America, Central                           | 13                      | 14                                | 14                               | 13         | 8.8                    | -0.1                  | -4.6               | 4.1           |
| Asia, Southeast                                  | 48                      | 48                                | 48                               | 51         | -0.7                   | -0.8                  | 6.0                | 4.6           |
| Asia, Central                                    | 6                       | 5                                 | 5                                | 5          | -12.0                  | -2.6                  | -0.9               | -15.5         |
| Latin America, Andean                            | 3                       | 4                                 | 4                                | 4          | 12.0                   | -0.3                  | -1.2               | 10.5          |
| North Africa/Middle East                         | 30                      | 32                                | 31                               | 33         | 4.1                    | -1.7                  | 7.2                | 9.5           |
| Caribbean                                        | 3                       | 3                                 | 3                                | 3          | 2.6                    | -1.3                  | -1.1               | 0.2           |
| Asia, South                                      | 106                     | 123                               | 122                              | 129        | 16.9                   | -1.3                  | 6.9                | 22.4          |
| Oceania                                          | 1                       | 1                                 | 1                                | 1          | 41.4                   | -0.1                  | -0.5               | 40.8          |
| Sub-Saharan, Africa Southern                     | 4                       | 4                                 | 4                                | 4          | 6.7                    | -1.1                  | 3.2                | 8.8           |
| Sub-Saharan, Africa East                         | 19                      | 31                                | 31                               | 32         | 62.1                   | 0.0                   | 2.2                | 64.3          |
| Sub-Saharan, Africa Central                      | 5                       | 9                                 | 9                                | 9          | 79.1                   | 0.2                   | -0.8               | 78.6          |
| Sub-Saharan, Africa West                         | 18                      | 29                                | 29                               | 29         | 59.3                   | -0.2                  | -0.2               | 58.9          |
| <b>DALYs per capita (per 100,000 population)</b> |                         |                                   |                                  |            |                        |                       |                    |               |
| Global                                           | 25                      | 25                                | 25                               | 25         | 0.0                    | -1.0                  | -0.7               | -1.7          |
| Asia-Pacific, High income                        | 15                      | 15                                | 15                               | 13         | 0.0                    | -0.6                  | -10.5              | -11.2         |
| Europe, Western                                  | 9                       | 9                                 | 9                                | 9          | 0.0                    | 0.1                   | -0.1               | 0.0           |
| Australasia                                      | 8                       | 8                                 | 8                                | 7          | 0.0                    | -1.4                  | -15.6              | -17.1         |
| North America, High income                       | 13                      | 13                                | 13                               | 13         | 0.0                    | 0.0                   | 0.2                | 0.2           |
| Europe, Central                                  | 26                      | 26                                | 26                               | 26         | 0.0                    | -0.8                  | -1.9               | -2.6          |
| Latin America, Southern                          | 11                      | 11                                | 11                               | 11         | 0.0                    | -0.9                  | 0.6                | -0.2          |
| Europe, Eastern                                  | 24                      | 24                                | 24                               | 23         | 0.0                    | -1.8                  | -2.3               | -4.1          |
| Asia, East                                       | 32                      | 32                                | 31                               | 28         | 0.0                    | -2.8                  | -8.6               | -11.5         |
| Latin America, Tropical                          | 27                      | 27                                | 27                               | 26         | 0.0                    | -1.1                  | -2.8               | -3.9          |
| Latin America, Central                           | 21                      | 21                                | 21                               | 20         | 0.0                    | -0.1                  | -4.2               | -4.3          |
| Asia, Southeast                                  | 31                      | 31                                | 31                               | 33         | 0.0                    | -0.8                  | 6.1                | 5.3           |
| Asia, Central                                    | 25                      | 25                                | 24                               | 24         | 0.0                    | -3.0                  | -1.0               | -4.0          |
| Latin America, Andean                            | 24                      | 24                                | 24                               | 24         | 0.0                    | -0.3                  | -1.1               | -1.3          |
| North Africa/Middle East                         | 26                      | 26                                | 25                               | 27         | 0.0                    | -1.7                  | 6.9                | 5.3           |
| Caribbean                                        | 28                      | 28                                | 27                               | 27         | 0.0                    | -1.3                  | -1.1               | -2.4          |
| Asia, South                                      | 26                      | 26                                | 26                               | 27         | 0.0                    | -1.1                  | 5.9                | 4.7           |
| Oceania                                          | 28                      | 28                                | 28                               | 28         | 0.0                    | -0.1                  | -0.3               | -0.4          |
| Sub-Saharan, Africa Southern                     | 19                      | 19                                | 19                               | 20         | 0.0                    | -1.1                  | 3.0                | 2.0           |
| Sub-Saharan, Africa East                         | 22                      | 22                                | 22                               | 22         | 0.0                    | 0.0                   | 1.4                | 1.4           |
| Sub-Saharan, Africa Central                      | 22                      | 22                                | 22                               | 22         | 0.0                    | 0.1                   | -0.4               | -0.3          |
| Sub-Saharan, Africa West                         | 22                      | 22                                | 22                               | 22         | 0.0                    | -0.1                  | -0.1               | -0.3          |

\*Regions are ordered by mean age of death.

<sup>a</sup>Estimates for 1990 were recalculated following the GBD 2010 Study protocol.

<sup>b</sup>DALYs expected with 2010, 1990 population age structure, and 1990 DALY rates (in thousands).

<sup>c</sup>DALYs expected with 2010, 2010 population age structure, and 2010 DALY rates (in thousands).

**Appendix Table 3.** Changes in Disability-adjusted Life-years (DALYs, in thousands) and DALYs *per capita* (per 100,000 population) between 1990 and 2010 by GBD Regions\*, Shown as Changes due to Population Growth, Aging, and Changes in Gender- and Age-specific Disease Rates (untreated caries in permanent teeth only)

| Region                                          | 1990<br>DALYs <sup>a</sup> | Isolated Pop.<br>Growth <sup>b</sup> | Isolated Pop.<br>Aging <sup>c</sup> | 2010<br>DALYs | % Δ Due to<br>Pop. Growth | % Δ Due to<br>Pop. Aging | % Δ Due to<br>Δ Rates | % Δ 1990-<br>2010 |
|-------------------------------------------------|----------------------------|--------------------------------------|-------------------------------------|---------------|---------------------------|--------------------------|-----------------------|-------------------|
| <b>DALYs (in thousands)</b>                     |                            |                                      |                                     |               |                           |                          |                       |                   |
| Global                                          | 3,304                      | 4,422                                | 4,441                               | 4,562         | 33.9                      | 0.6                      | 3.7                   | 38.1              |
| Asia-Pacific, High income                       | 32                         | 35                                   | 35                                  | 35            | 7.3                       | 0.7                      | 0.2                   | 8.2               |
| Europe, Western                                 | 102                        | 112                                  | 113                                 | 114           | 9.8                       | 1.0                      | 1.3                   | 12.1              |
| Australasia                                     | 3                          | 4                                    | 4                                   | 4             | 27.7                      | 0.3                      | 4.5                   | 32.6              |
| North America, High income                      | 46                         | 57                                   | 57                                  | 57            | 23.6                      | 0.0                      | -1.4                  | 22.2              |
| Europe, Central                                 | 115                        | 115                                  | 116                                 | 116           | -0.2                      | 1.1                      | 0.2                   | 1.0               |
| Latin America, Southern                         | 15                         | 19                                   | 19                                  | 20            | 26.3                      | 3.1                      | 0.8                   | 30.1              |
| Europe, Eastern                                 | 190                        | 182                                  | 184                                 | 183           | -4.5                      | 1.1                      | -0.6                  | -4.0              |
| Asia, East                                      | 827                        | 1,018                                | 1,025                               | 1,028         | 23.1                      | 0.8                      | 0.4                   | 24.4              |
| Latin America, Tropical                         | 68                         | 93                                   | 96                                  | 97            | 36.8                      | 4.6                      | 0.5                   | 41.9              |
| Latin America, Central                          | 90                         | 131                                  | 135                                 | 135           | 44.6                      | 4.3                      | 0.3                   | 49.3              |
| Asia, Southeast                                 | 299                        | 412                                  | 427                                 | 433           | 38.0                      | 4.9                      | 1.9                   | 44.8              |
| Asia, Central                                   | 48                         | 59                                   | 61                                  | 61            | 21.5                      | 3.9                      | -0.1                  | 25.3              |
| Latin America, Andean                           | 22                         | 31                                   | 32                                  | 32            | 44.1                      | 4.2                      | 1.1                   | 49.4              |
| North Africa/Middle East                        | 180                        | 281                                  | 297                                 | 297           | 56.1                      | 9.1                      | 0.2                   | 65.4              |
| Caribbean                                       | 20                         | 26                                   | 26                                  | 26            | 27.9                      | 1.6                      | -0.9                  | 28.6              |
| Asia, South                                     | 947                        | 1,416                                | 1,438                               | 1,413         | 49.5                      | 2.3                      | -2.7                  | 49.1              |
| Oceania                                         | 4                          | 6                                    | 7                                   | 6             | 58.7                      | 3.2                      | -1.9                  | 60.0              |
| Sub-Saharan, Africa Southern                    | 36                         | 51                                   | 52                                  | 52            | 40.0                      | 4.5                      | -0.3                  | 44.2              |
| Sub-Saharan, Africa East                        | 117                        | 204                                  | 207                                 | 206           | 74.4                      | 2.6                      | -0.6                  | 76.3              |
| Sub-Saharan, Africa Central                     | 33                         | 60                                   | 60                                  | 60            | 83.4                      | 1.0                      | 1.5                   | 86.0              |
| Sub-Saharan, Africa West                        | 109                        | 184                                  | 188                                 | 187           | 69.4                      | 3.1                      | -0.5                  | 71.9              |
| <b>DALYs per capita (per 100000 population)</b> |                            |                                      |                                     |               |                           |                          |                       |                   |
| Global                                          | 71                         | 71                                   | 71                                  | 73            | 0.0                       | 0.4                      | 2.7                   | 3.2               |
| Asia-Pacific, High income                       | 21                         | 21                                   | 21                                  | 21            | 0.0                       | 0.6                      | 0.2                   | 0.8               |
| Europe, Western                                 | 28                         | 28                                   | 29                                  | 29            | 0.0                       | 0.9                      | 1.2                   | 2.1               |
| Australasia                                     | 15                         | 15                                   | 15                                  | 16            | 0.0                       | 0.3                      | 3.5                   | 3.8               |
| North America, High income                      | 18                         | 18                                   | 18                                  | 18            | 0.0                       | 0.0                      | -1.2                  | -1.2              |
| Europe, Central                                 | 102                        | 102                                  | 103                                 | 103           | 0.0                       | 1.1                      | 0.2                   | 1.3               |
| Latin America, Southern                         | 34                         | 34                                   | 35                                  | 35            | 0.0                       | 2.4                      | 0.6                   | 3.1               |
| Europe, Eastern                                 | 93                         | 93                                   | 94                                  | 93            | 0.0                       | 1.2                      | -0.6                  | 0.5               |
| Asia, East                                      | 78                         | 78                                   | 79                                  | 79            | 0.0                       | 0.7                      | 0.3                   | 1.0               |
| Latin America, Tropical                         | 50                         | 50                                   | 52                                  | 52            | 0.0                       | 3.3                      | 0.3                   | 3.7               |
| Latin America, Central                          | 63                         | 63                                   | 65                                  | 65            | 0.0                       | 3.0                      | 0.2                   | 3.2               |
| Asia, Southeast                                 | 75                         | 75                                   | 77                                  | 78            | 0.0                       | 3.5                      | 1.4                   | 4.9               |
| Asia, Central                                   | 82                         | 82                                   | 84                                  | 84            | 0.0                       | 3.2                      | -0.1                  | 3.1               |
| Latin America, Andean                           | 65                         | 65                                   | 67                                  | 67            | 0.0                       | 2.9                      | 0.7                   | 3.7               |
| North Africa/Middle East                        | 70                         | 70                                   | 74                                  | 75            | 0.0                       | 5.8                      | 0.1                   | 6.0               |
| Caribbean                                       | 75                         | 75                                   | 76                                  | 75            | 0.0                       | 1.2                      | -0.7                  | 0.5               |
| Asia, South                                     | 99                         | 99                                   | 100                                 | 98            | 0.0                       | 1.6                      | -1.8                  | -0.2              |
| Oceania                                         | 82                         | 82                                   | 83                                  | 82            | 0.0                       | 2.0                      | -1.2                  | 0.8               |
| Sub-Saharan, Africa Southern                    | 81                         | 81                                   | 83                                  | 83            | 0.0                       | 3.2                      | -0.2                  | 3.0               |
| Sub-Saharan, Africa East                        | 69                         | 69                                   | 70                                  | 70            | 0.0                       | 1.5                      | -0.4                  | 1.1               |
| Sub-Saharan, Africa Central                     | 76                         | 76                                   | 76                                  | 77            | 0.0                       | 0.6                      | 0.8                   | 1.4               |
| Sub-Saharan, Africa West                        | 66                         | 66                                   | 67                                  | 67            | 0.0                       | 1.8                      | -0.3                  | 1.5               |

\*Regions are ordered by mean age of death.

<sup>a</sup>Estimates for 1990 were recalculated following the GBD 2010 Study protocol.

<sup>b</sup>DALYs expected with 2010, 1990 population age structure, and 1990 DALY rates (in thousands).

<sup>c</sup>DALYs expected with 2010, 2010 population age structure, and 2010 DALY rates (in thousands).

**Appendix Table 4.** Changes in Disability-adjusted Life-years (DALYs, in thousands) and DALYs *per capita* (per 100,000 population) between 1990 and 2010 by GBD Regions\*, Shown as Changes due to Population Growth, Aging, and Changes in Gender- and Age-specific Disease Rates (severe periodontitis only)

| Region                                          | 1990 DALYs <sup>a</sup> | Isolated Pop. Growth <sup>b</sup> | Isolated Pop. Aging <sup>c</sup> | 2010 DALYs | % Δ Due to Pop. Growth | % Δ Due to Pop. Aging | % Δ Due to Δ Rates | % Δ 1990-2010 |
|-------------------------------------------------|-------------------------|-----------------------------------|----------------------------------|------------|------------------------|-----------------------|--------------------|---------------|
| <b>DALYs (in thousands)</b>                     |                         |                                   |                                  |            |                        |                       |                    |               |
| Global                                          | 3,441                   | 4,862                             | 5,372                            | 5,413      | 41.3                   | 14.8                  | 1.2                | 57.3          |
| Asia-Pacific, High income                       | 112                     | 127                               | 146                              | 149        | 13.6                   | 17.0                  | 2.5                | 33.0          |
| Europe, Western                                 | 327                     | 368                               | 407                              | 391        | 12.3                   | 12.0                  | -4.8               | 19.5          |
| Australasia                                     | 23                      | 31                                | 34                               | 35         | 31.4                   | 15.7                  | 3.7                | 50.7          |
| North America, High income                      | 159                     | 200                               | 221                              | 224        | 25.6                   | 13.2                  | 1.4                | 40.3          |
| Europe, Central                                 | 116                     | 125                               | 132                              | 133        | 7.8                    | 6.0                   | 1.0                | 14.9          |
| Latin America, Southern                         | 68                      | 91                                | 95                               | 95         | 34.0                   | 6.9                   | -0.8               | 40.1          |
| Europe, Eastern                                 | 245                     | 252                               | 260                              | 265        | 2.7                    | 3.2                   | 2.2                | 8.1           |
| Asia, East                                      | 770                     | 1,008                             | 1,262                            | 1,272      | 31.0                   | 33.0                  | 1.2                | 65.2          |
| Latin America, Tropical                         | 139                     | 209                               | 242                              | 250        | 50.4                   | 24.0                  | 5.7                | 80.1          |
| Latin America, Central                          | 113                     | 180                               | 213                              | 210        | 58.5                   | 29.2                  | -2.8               | 85.0          |
| Asia, Southeast                                 | 308                     | 468                               | 553                              | 545        | 51.9                   | 27.6                  | -2.6               | 77.0          |
| Asia, Central                                   | 51                      | 68                                | 71                               | 69         | 32.9                   | 6.6                   | -3.9               | 35.5          |
| Latin America, Andean                           | 26                      | 41                                | 46                               | 46         | 55.7                   | 18.4                  | 1.8                | 76.0          |
| North Africa/Middle East                        | 132                     | 237                               | 261                              | 257        | 79.4                   | 18.2                  | -2.7               | 94.9          |
| Caribbean                                       | 16                      | 21                                | 25                               | 24         | 34.6                   | 23.0                  | -7.9               | 49.6          |
| Asia, South                                     | 543                     | 875                               | 940                              | 943        | 61.0                   | 12.0                  | 0.6                | 73.6          |
| Oceania                                         | 1                       | 2                                 | 2                                | 2          | 66.2                   | 17.7                  | 3.2                | 87.1          |
| Sub-Saharan, Africa Southern                    | 20                      | 31                                | 33                               | 34         | 53.4                   | 8.9                   | 5.7                | 68.0          |
| Sub-Saharan, Africa East                        | 167                     | 299                               | 295                              | 292        | 79.1                   | -2.5                  | -1.8               | 74.8          |
| Sub-Saharan, Africa Central                     | 28                      | 51                                | 48                               | 48         | 82.7                   | -10.1                 | -2.4               | 70.1          |
| Sub-Saharan, Africa West                        | 75                      | 130                               | 126                              | 129        | 74.2                   | -5.3                  | 3.4                | 72.4          |
| <b>DALYs per capita (per 100000 population)</b> |                         |                                   |                                  |            |                        |                       |                    |               |
| Global                                          | 97                      | 97                                | 107                              | 108        | 0.0                    | 10.5                  | 0.8                | 11.3          |
| Asia-Pacific, High income                       | 83                      | 83                                | 96                               | 98         | 0.0                    | 14.9                  | 2.2                | 17.1          |
| Europe, Western                                 | 105                     | 105                               | 116                              | 112        | 0.0                    | 10.7                  | -4.3               | 6.4           |
| Australasia                                     | 146                     | 146                               | 164                              | 168        | 0.0                    | 11.9                  | 2.8                | 14.7          |
| North America, High income                      | 73                      | 73                                | 81                               | 82         | 0.0                    | 10.5                  | 1.1                | 11.6          |
| Europe, Central                                 | 124                     | 124                               | 130                              | 132        | 0.0                    | 5.6                   | 0.9                | 6.5           |
| Latin America, Southern                         | 198                     | 198                               | 208                              | 207        | 0.0                    | 5.1                   | -0.6               | 4.6           |
| Europe, Eastern                                 | 143                     | 143                               | 147                              | 150        | 0.0                    | 3.1                   | 2.1                | 5.2           |
| Asia, East                                      | 90                      | 90                                | 113                              | 114        | 0.0                    | 25.2                  | 0.9                | 26.1          |
| Latin America, Tropical                         | 140                     | 140                               | 162                              | 167        | 0.0                    | 16.0                  | 3.8                | 19.8          |
| Latin America, Central                          | 112                     | 112                               | 132                              | 130        | 0.0                    | 18.4                  | -1.8               | 16.7          |
| Asia, Southeast                                 | 106                     | 106                               | 125                              | 123        | 0.0                    | 18.2                  | -1.7               | 16.5          |
| Asia, Central                                   | 116                     | 116                               | 122                              | 119        | 0.0                    | 4.9                   | -2.9               | 2.0           |
| Latin America, Andean                           | 111                     | 111                               | 124                              | 126        | 0.0                    | 11.8                  | 1.2                | 13.0          |
| North Africa/Middle East                        | 76                      | 76                                | 83                               | 82         | 0.0                    | 10.1                  | -1.5               | 8.6           |
| Caribbean                                       | 78                      | 78                                | 91                               | 86         | 0.0                    | 17.1                  | -5.9               | 11.2          |
| Asia, South                                     | 79                      | 79                                | 85                               | 86         | 0.0                    | 7.5                   | 0.4                | 7.8           |
| Oceania                                         | 32                      | 32                                | 36                               | 36         | 0.0                    | 10.6                  | 1.9                | 12.5          |
| Sub-Saharan, Africa Southern                    | 65                      | 65                                | 69                               | 72         | 0.0                    | 5.8                   | 3.7                | 9.5           |
| Sub-Saharan, Africa East                        | 149                     | 149                               | 146                              | 145        | 0.0                    | -1.4                  | -1.0               | -2.4          |
| Sub-Saharan, Africa Central                     | 98                      | 98                                | 93                               | 91         | 0.0                    | -5.5                  | -1.3               | -6.9          |
| Sub-Saharan, Africa West                        | 68                      | 68                                | 66                               | 67         | 0.0                    | -3.0                  | 2.0                | -1.0          |

\*Regions are ordered by mean age of death.

<sup>a</sup>Estimates for 1990 were recalculated following the GBD 2010 Study protocol.

<sup>b</sup>DALYs expected with 2010, 1990 population age structure, and 1990 DALY rates (in thousands).

<sup>c</sup>DALYs expected with 2010, 2010 population age structure, and 2010 DALY rates (in thousands).

**Appendix Table 5.** Changes in Disability-adjusted Life-years (DALYs, in thousands) and DALYs *per capita* (per 100,000 population) between 1990 and 2010 by GBD Regions\*, Shown as Changes due to Population Growth, Aging, and Changes in Gender- and Age-specific Disease Rates (severe tooth loss only)

| Region                                           | 1990 DALYs <sup>a</sup> | Isolated Pop. Growth <sup>b</sup> | Isolated Pop. Aging <sup>c</sup> | 2010 DALYs | % Δ Due to Pop. Growth | % Δ Due to Pop. Aging | % Δ Due to Δ Rates | % Δ 1990-2010 |
|--------------------------------------------------|-------------------------|-----------------------------------|----------------------------------|------------|------------------------|-----------------------|--------------------|---------------|
| <b>Total DALYs (in thousands)</b>                |                         |                                   |                                  |            |                        |                       |                    |               |
| Global                                           | 5,324                   | 7,749                             | 8,508                            | 4,668      | 45.5                   | 14.3                  | -72.1              | -12.3         |
| Asia-Pacific, High income                        | 226                     | 270                               | 391                              | 188        | 19.4                   | 53.9                  | -90.2              | -16.9         |
| Europe, Western                                  | 721                     | 829                               | 957                              | 546        | 15.0                   | 17.7                  | -57.0              | -24.3         |
| Australasia                                      | 38                      | 51                                | 61                               | 34         | 34.7                   | 25.3                  | -70.5              | -10.5         |
| North America, High income                       | 430                     | 544                               | 611                              | 356        | 26.4                   | 15.6                  | -59.4              | -17.4         |
| Europe, Central                                  | 249                     | 277                               | 318                              | 140        | 11.3                   | 16.6                  | -71.7              | -43.8         |
| Latin America, Southern                          | 65                      | 88                                | 97                               | 60         | 36.4                   | 13.9                  | -57.8              | -7.5          |
| Europe, Eastern                                  | 437                     | 459                               | 495                              | 277        | 5.0                    | 8.3                   | -49.8              | -36.6         |
| Asia, East                                       | 697                     | 968                               | 1,173                            | 676        | 38.9                   | 29.4                  | -71.3              | -3.0          |
| Latin America, Tropical                          | 238                     | 375                               | 457                              | 212        | 57.4                   | 34.5                  | -103.0             | -11.2         |
| Latin America, Central                           | 194                     | 324                               | 378                              | 167        | 66.7                   | 28.1                  | -108.7             | -14.0         |
| Asia, Southeast                                  | 313                     | 500                               | 572                              | 282        | 59.6                   | 23.3                  | -92.8              | -10.0         |
| Asia, Central                                    | 73                      | 97                                | 96                               | 54         | 33.7                   | -0.9                  | -58.7              | -25.9         |
| Latin America, Andean                            | 44                      | 71                                | 82                               | 46         | 61.7                   | 25.4                  | -81.4              | 5.7           |
| North Africa/Middle East                         | 328                     | 618                               | 641                              | 287        | 88.7                   | 6.9                   | -107.9             | -12.3         |
| Caribbean                                        | 54                      | 75                                | 86                               | 45         | 39.2                   | 19.4                  | -75.5              | -16.8         |
| Asia, South                                      | 894                     | 1,474                             | 1,584                            | 1,015      | 64.8                   | 12.3                  | -63.7              | 13.5          |
| Oceania                                          | 3                       | 5                                 | 5                                | 3          | 73.5                   | 13.1                  | -72.6              | 14.0          |
| Sub-Saharan, Africa Southern                     | 48                      | 76                                | 85                               | 38         | 58.4                   | 18.3                  | -98.4              | -21.7         |
| Sub-Saharan, Africa East                         | 131                     | 236                               | 234                              | 128        | 80.1                   | -1.0                  | -80.9              | -1.8          |
| Sub-Saharan, Africa Central                      | 34                      | 60                                | 57                               | 32         | 80.1                   | -10.9                 | -73.6              | -4.5          |
| Sub-Saharan, Africa West                         | 108                     | 190                               | 183                              | 83         | 75.3                   | -5.9                  | -92.7              | -23.2         |
| <b>DALYs per capita (per 100,000 population)</b> |                         |                                   |                                  |            |                        |                       |                    |               |
| Global                                           | 175                     | 175                               | 192                              | 106        | 0.0                    | 9.8                   | -49.5              | -39.8         |
| Asia-Pacific, High income                        | 189                     | 189                               | 274                              | 131        | 0.0                    | 45.1                  | -75.6              | -30.4         |
| Europe, Western                                  | 254                     | 254                               | 293                              | 167        | 0.0                    | 15.4                  | -49.6              | -34.1         |
| Australasia                                      | 266                     | 266                               | 316                              | 177        | 0.0                    | 18.8                  | -52.4              | -33.6         |
| North America, High income                       | 218                     | 218                               | 245                              | 142        | 0.0                    | 12.3                  | -47.0              | -34.6         |
| Europe, Central                                  | 296                     | 296                               | 341                              | 150        | 0.0                    | 14.9                  | -64.4              | -49.5         |
| Latin America, Southern                          | 217                     | 217                               | 239                              | 147        | 0.0                    | 10.2                  | -42.4              | -32.2         |
| Europe, Eastern                                  | 280                     | 280                               | 302                              | 169        | 0.0                    | 7.9                   | -47.4              | -39.6         |
| Asia, East                                       | 96                      | 96                                | 116                              | 67         | 0.0                    | 21.1                  | -51.3              | -30.2         |
| Latin America, Tropical                          | 283                     | 283                               | 345                              | 160        | 0.0                    | 21.9                  | -65.5              | -43.6         |
| Latin America, Central                           | 234                     | 234                               | 273                              | 121        | 0.0                    | 16.8                  | -65.2              | -48.4         |
| Asia, Southeast                                  | 129                     | 129                               | 148                              | 73         | 0.0                    | 14.6                  | -58.2              | -43.6         |
| Asia, Central                                    | 194                     | 194                               | 192                              | 107        | 0.0                    | -0.7                  | -43.9              | -44.6         |
| Latin America, Andean                            | 226                     | 226                               | 261                              | 148        | 0.0                    | 15.7                  | -50.3              | -34.6         |
| North Africa/Middle East                         | 229                     | 229                               | 238                              | 107        | 0.0                    | 3.7                   | -57.2              | -53.5         |
| Caribbean                                        | 313                     | 313                               | 357                              | 187        | 0.0                    | 14.0                  | -54.2              | -40.2         |
| Asia, South                                      | 157                     | 157                               | 169                              | 108        | 0.0                    | 7.5                   | -38.6              | -31.2         |
| Oceania                                          | 100                     | 100                               | 107                              | 65         | 0.0                    | 7.5                   | -41.8              | -34.3         |
| Sub-Saharan, Africa Southern                     | 189                     | 189                               | 211                              | 94         | 0.0                    | 11.5                  | -62.1              | -50.6         |
| Sub-Saharan, Africa East                         | 145                     | 145                               | 144                              | 79         | 0.0                    | -0.6                  | -44.9              | -45.5         |
| Sub-Saharan, Africa Central                      | 145                     | 145                               | 137                              | 77         | 0.0                    | -6.0                  | -40.9              | -46.9         |
| Sub-Saharan, Africa West                         | 121                     | 121                               | 117                              | 53         | 0.0                    | -3.4                  | -52.8              | -56.2         |

\*Regions are ordered by mean age of death.

<sup>a</sup>Estimates for 1990 were recalculated following the GBD 2010 Study protocol.

<sup>b</sup>DALYs expected with 2010, 1990 population age structure, and 1990 DALY rates (in thousands).

<sup>c</sup>DALYs expected with 2010, 2010 population age structure, and 2010 DALY rates (in thousands).
